# Supplementary material
Source: publisher figshare collection journal article supplement (https://future-science-group.figshare.com/ndownloader/files/34495607)
Supplement: Supplementary file 1 [file 34495607]

**Supplementary table 1.** Antibodies applied in western blot.

| Antibody | Company | Cat. no. | Dilution |
| --- | --- | --- | --- |
| **Primary Antibody** |  |  |  |
| Rabbit monoclonal to AMPK | Abcam (UK) | ab32047 | 1:3000 |
| Rabbit monoclonal to Phospho-AMPK | CST (USA) | 50081 | 1:1000 |
| Rabbit monoclonal to mTOR | CST (USA) | 2983 | 1:1000 |
| Rabbit monoclonal to Phospho-mTOR | CST (USA) | 2971 | 1:1000 |
| Rabbit monoclonal to PKA | CST (USA) | 4782 | 1:1000 |
| Rabbit monoclonal to CREB | CST (USA) | 9197 | 1:1000 |
| Rabbit monoclonal to Phospho-CREB | CST (USA) | 9198 | 1:1000 |
| Rabbit monoclonal to Gli1 | CST (USA) | 3538 | 1:1000 |
| Rabbit polyclonal to PTCH1 | Abcam (UK) | ab53715 | 1:500 |
| Rabbit polyclonal to GAPDH | Abcam (UK) | ab9485 | 1:2500 |
| **Secondary Antibody** |  |  |  |
| Goat Anti-Rabbit IgG-HRP | CST (USA) | 7074 | 1:3000 |
